# Supplementary material for: A LC-MS3 strategy to determine lamotrigine by Q-Q-trap tandem mass spectrometry coupled with triple stage fragmentation to enhance sensitivity and selectivity
Source: Royal Society of Chemistry journal article supplement (doi:10.1039/d1ay01372f), 2021-01-01
Supplement: d1ay01372f1.pdf [file d1ay01372f1.pdf]

## **LC–MS<sup>3</sup> strategy for quantitative analysis of lamotrigine by Q-Q-Trap tandem mass spectrometry coupled with triple stage fragmentation to enhance sensitivity and selectivity**

Meiyun Shi<sup>a</sup>, Qihong Jiang<sup>a</sup>, Qiushi Lyu<sup>a</sup>, Zhengting Yuan<sup>c</sup>, Lili Deng<sup>d,e</sup>, Lei Yin<sup>a,b\*\*\*</sup>

*<sup>a</sup>School of Life and Pharmaceutical Sciences, Dalian University of Technology, Panjin, 124221, PR China*

*<sup>b</sup>Department of Laboratory Medicine, The First Hospital of Jilin University, Jilin University, Xinmin Street, Changchun 130061, PR China*

*<sup>c</sup>School of Foreign Languages, Dalian University of Technology, Panjin, 124221, PR China*

*<sup>d</sup>Chongqing Health Statistics Information Center, Chongqing, 400021, PR China*

*<sup>e</sup>Key Laboratory of Laboratory Medical Diagnostics, Ministry of Education, Department of Laboratory Medicine, Chongqing Medical University, Chongqing, 400016, PR China*

\*Corresponding author. leiyin@dlut.edu.cn (Lei Yin)

**The Supporting Information included method validation for analysis of lamotrigine and table S1.**

**Table S1. The concentration of lamotrigine in 25 human plasma samples analyzed by LC-MRM and LC-MS<sup>3</sup>.**

### **Method validation for analysis of lamotrigine.**

Selectivity was proved using blank plasma samples from six human, which were individually analyzed and evaluated for interference. In addition, cross-talk and carryover phenomena among MS/MS channels were evaluated by injecting analytes and IS, separately, at the highest concentrations of the calibration curve and monitoring the responses in the other MS/MS channels. Linearity was evaluated by linear least-squares regression with a weighting index of  $1/x^2$  of calibration curves based on peak area ratios of analyte : IS prepared in duplicate on three separate days. Accuracy (as relative error (R.E.)) and intra- and inter-day precision (as relative standard deviation (R.S.D.)) were based on assay of six replicate QC samples on three different days. The lower limit of quantitation (LLOQ) was defined as the lowest concentration that could be determined with accuracy  $\pm 20\%$  and precision  $< 15\%$ . Matrix effects were evaluated by comparing peak areas of analytes and IS in post-extraction spiked samples with those in standard solutions. Recovery was determined by comparing peak areas of QC samples with those of post-extraction blank plasma spiked at corresponding concentrations. Stability of analytes in human plasma was evaluated in QC samples placed on storage for 20 days at  $-80^\circ\text{C}$ , for 2 h at room temperature ( $25^\circ\text{C}$ ) and after three freeze/thaw cycles. Stability of analytes in processed samples on storage in autosampler vials at  $4^\circ\text{C}$  for 8 h was also evaluated.

**Table S1. The concentration of lamotrigine in 25 human plasma samples analyzed by LC-MRM and LC-MS<sup>3</sup>.**

|          | MRM  | MS <sup>3</sup> | %     |
|----------|------|-----------------|-------|
| SAMPLE1  | 4.70 | 5.23            | 89.9  |
| SAMPLE2  | 13.1 | 13.0            | 100.8 |
| SAMPLE3  | 6.68 | 6.83            | 97.8  |
| SAMPLE4  | 1.86 | 2.17            | 85.7  |
| SAMPLE5  | 3.15 | 4.2             | 75.0  |
| SAMPLE6  | 3.06 | 3.32            | 92.2  |
| SAMPLE7  | 2.15 | 1.93            | 111.4 |
| SAMPLE8  | 2.59 | 3.07            | 84.4  |
| SAMPLE9  | 2.95 | 3.11            | 94.9  |
| SAMPLE10 | 6.62 | 7.3             | 90.7  |
| SAMPLE11 | 4.69 | 5.32            | 88.2  |
| SAMPLE12 | 2.29 | 2.49            | 92.0  |
| SAMPLE13 | 1.18 | 1.28            | 92.2  |
| SAMPLE14 | 5.93 | 6.53            | 90.8  |
| SAMPLE15 | 4.47 | 4.11            | 108.8 |
| SAMPLE16 | 8.16 | 9.25            | 88.2  |
| SAMPLE17 | 6.71 | 7.66            | 87.6  |
| SAMPLE18 | 6.4  | 6.38            | 100.3 |
| SAMPLE19 | 4.68 | 4.67            | 100.2 |
| SAMPLE20 | 4.05 | 3.34            | 121.3 |
| SAMPLE21 | 2.92 | 2.54            | 115.0 |
| SAMPLE22 | 4.26 | 4.22            | 100.9 |
| SAMPLE23 | 3.45 | 3.83            | 90.1  |
| SAMPLE24 | 1.65 | 1.9             | 86.8  |
| SAMPLE25 | 8.53 | 6.94            | 122.9 |
